# Supplementary material
Source: Springer Nature journal article supplement (https://springermedizin.de/resource/supplementary/13075_2012_3844_MOESM5_ESM.pdf/9695464)

**a**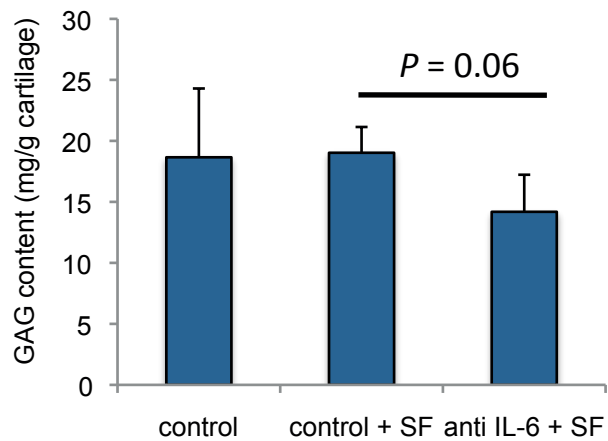**b**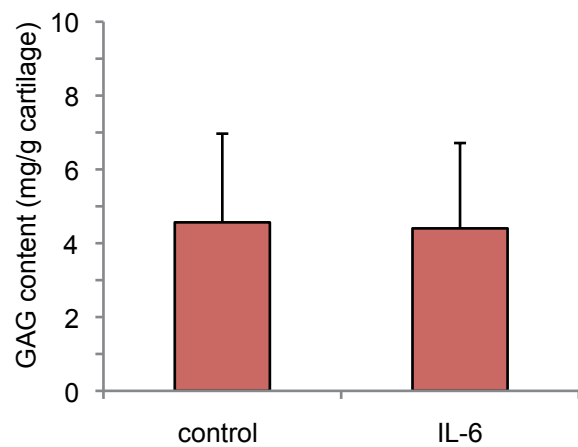**c**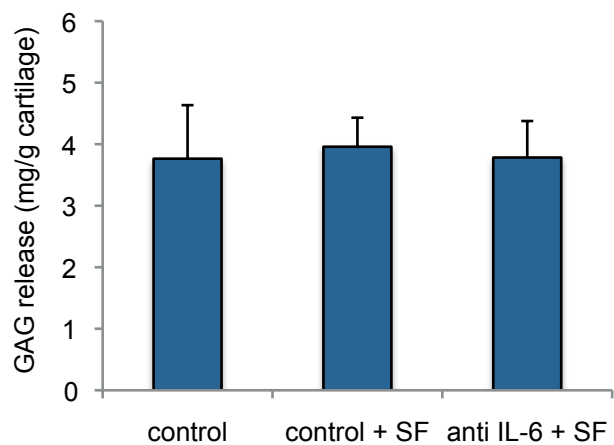**d**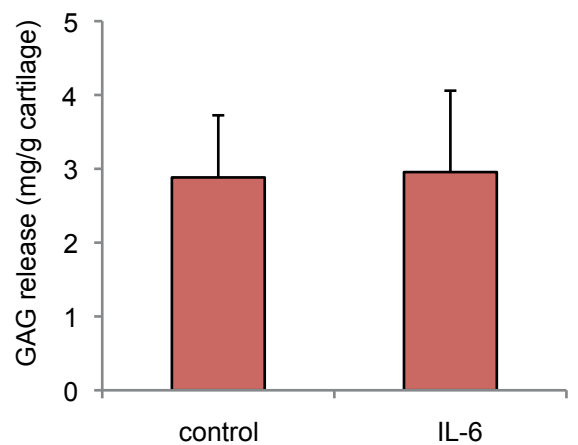

Supplement: MOESM5 [file 9695464]
